# Supplementary material for: Using routinely collected health data to estimate child health service coverage in Ghanaian health facilities
Source: Research Square preprint supplement (doi:10.21203/rs.3.rs-6790840/v1), 2025-07-14
Supplement: Supplementary file 1 [file e34fb0d3a962b580276866d8.docx]

**Using routinely collected health data to estimate child health service coverage in Ghanaian health facilities: Supplementary file**

**Data quality assessment and adjustment**

The infrastructure surrounding routinely collected health data (RCHD) is often termed the routine health information system (RHIS), and is concerned with the continuous collection and regular reporting of population-level data describing actual service utilisation in individual health facilities (HFs) [1, 2]. The World Health Organization’s Data Quality Review [3] proposes standards to which every national RHIS should aspire and provides guidelines for assessing, improving and maintaining the quality of RCHD (**Table S1**). Maina and colleagues integrated some of the concepts outlined by the Data Quality Review into their estimation approach, which incorporates a series of systematic steps directed towards checking and correcting individual data points reported to the District Health Information Software (DHIS2) platform and representing administrative unit/month/indicator combinations [4]. Standard Stata scripts for district-level implementation of Maina and colleagues’ approach hosted by the Countdown to 2030 Collaboration [5] reproduce the same data quality (DQ) checks and adjustments, and were used in the present study to assess the overall quality of data reported to Ghana’s District Health Information Management System (DHIMS2) by Eastern region HFs in 2020. All checks were performed at region-/district-levels only. Some checks were used to inform adjustments to the DHIMS2 extract; these checks and adjustments are described in detail below, but are also outlined briefly in the main manuscript. All checks and adjustments were performed prior to estimation of population denominators and the coverage/utilisation of target interventions.

***Table S1: Dimensions of data quality outlined by the World Health Organization’s Data Quality Review***

| **Dimension** | **Definition** |
| --- | --- |
| Completeness of reporting | All, or a high proportion, of the entities (usually health facilities and/or districts) expected to submit data to the RHIS at an index timepoint have actually done so |
| Completeness of indicators | All, or a high proportion of, entities (health facilities and districts) have submitted data on a subset of specific, core indicators |
| Timeliness of reporting | All, or a high proportion of, entities (health facilities and districts) have submitted data relating to an index timepoint by a mandated deadline |
| Internal consistency of reported data | The data on a given indicator that are submitted at an index timepoint:  Cohere with past trends on the same indicator  Cohere with other, related indicators  Faithfully reflect the level of service utilisation that actually took place at that entity during the index time period |
| External consistency with other data sources | The data on a given indicator remain plausible when compared to a ‘gold standard’, which is usually taken as the data produced by household survey programmes |
| **Material adapted from: World Health Organization (2017) Data quality review: a toolkit for facility data quality assessment. Geneva: World Health Organization** | |

All indicators extracted from DHIMS2 by the Ghana Health Service (GHS) (**Table S2**) were incorporated into the DQ assessment but, for reporting purposes, were arranged into broader groups. The ‘vaccination delivery’ group brings together five health indicators related to essential childhood vaccinations: the Bacillus Calmette-Guerin (BCG) vaccination, the first (Penta1), second (Penta2), and third (Penta3) doses of the pentavalent vaccine, and the first dose of the measles-rubella vaccine (MRV1). The ‘diarrhoea service events’ group brings together diarrhoea-related health indicators: service events amongst children aged under 1 year, amongst children aged under 5 years, and in all ages combined. The ‘all services’ group encapsulates all of the health indicators extracted from DHIMS2 for the study.

***Table S2: Health indicators extracted from DHIMS2 and used to implement Maina and colleagues’ method***

| **Health indicator** | **Purpose** |
| --- | --- |
| Pentavalent vaccination, 1st dose | Benchmark intervention; data quality assessment |
| Pentavalent vaccination, 2nd dose | Target intervention; data quality assessment |
| Pentavalent vaccination, 3rd dose | Target intervention; data quality assessment |
| Measles-rubella vaccination, 1st dose | Target intervention; data quality assessment |
| Diarrhoeal disease outpatient attendances: less than 28 days of age | Target intervention; data quality assessment |
| Diarrhoeal disease outpatient attendances: 1-11 months of age | Target intervention; data quality assessment |
| Diarrhoeal disease outpatient attendances: 1-4 years of age | Data quality assessment |
| Diarrhoeal disease outpatient attendances: total for all age groups combined | Data quality assessment |
| All-cause outpatient attendances: less than 28 days of age | Data quality assessment |
| All-cause outpatient attendances: 1-11 months of age | Data quality assessment |
| All-cause outpatient attendances: 1-4 years of age | Data quality assessment |
| All-cause outpatient attendances: total for all age groups combined | Data quality assessment |
| All-cause inpatient admissions: less than 28 days of age | Data quality assessment |
| All-cause inpatient admissions: 1-11 months of age | Data quality assessment |
| All-cause inpatient admissions: 1-4 years of age | Data quality assessment |
| All-cause inpatient admissions: total for all age groups combined | Data quality assessment |
| Antenatal care, 1st visit | Data quality assessment |
| Antenatal care, at least 4 visits | Data quality assessment |
| Bacillus Calmette-Guerin vaccination | Data quality assessment |
| Caesarean sections | Data quality assessment |
| Deliveries in health facilities | Data quality assessment |
| Family planning, new visits/acceptors | Data quality assessment |
| Family planning, revisits | Data quality assessment |
| Intermittent preventive treatment for malaria in infants, 2nd dose | Data quality assessment |
| Postnatal care within 48 hours after delivery | Data quality assessment |
| Stillbirths (fresh) | Data quality assessment |
| Stillbirths (macerated) | Data quality assessment |
| Total number of deaths in health facilities amongst children under 5 years of age | Data quality assessment |
| Total number of maternal deaths in health facilities | Data quality assessment |

Completeness of reporting was checked by comparing the expected and actual number of reports submitted to DHIMS2. In respect of the latter, binary flags were created for each administrative unit/service type/month combination to indicate whether a report of at least one service event had been submitted to DHIMS2. Correctly distinguishing missing and zero value reports is a recognised issue when working with data extracted from DHIS2 [6], and was addressed here as a necessary preliminary step to implementing the reporting completeness check. In this case, the validity of null values (which may equally indicate that no report had been submitted or that no service events had taken place) was verified by comparison with the number of all-ages and all-cause outpatient service events reported to DHIMS2: in cases where at least one outpatient event had occurred but a null value was reported for a given service type with the same administrative unit/month combination, the binary flag was set to indicate that a valid, zero value report had been submitted. Binary flags for each service type were aggregated to calculate annual rates of reporting completeness, which were then checked as described in **Table S3**. Based on this check, values in the DHIMS2 extract were adjusted using equation [1], where represents the number of service events for a given health indicator, represents the observed reporting rate, and represents the adjustment factor. If incomplete reporting is assumed to indicate non-provision of the service then , but if it is assumed that the service was provided at a lower volume than HFs with complete reporting, is set to a value between 0 and 1. As a high level of reporting completeness was observed amongst Eastern region HFs the impact of this adjustment was considered negligible and the default -value of 0.25 assumed for all services. The same -value was employed by Maïga and colleagues for a study implementing the method in districts of Sierra Leone [7], where the completeness of reporting was found to have reached around 90%-95% for each of three priority maternal and child health indicators. Any remaining missing values were then adjusted by imputing the median of non-missing values for the same administrative unit/health indicator/year combination. All other DQ checks and analyses were performed after the completeness adjustment.

|  |  | [1] |
| --- | --- | --- |

Internal consistency over time was checked by comparing values reported in 2020 against trends derived from 2017-2019, and for each administrative unit/health indicator combination separately. The checks are detailed in **Table S3**. Outliers were defined using the Hampel identifier [8] as values exceeding five median absolute deviations (MADs) above/below the 2017-2019 median (equation [2]). Outliers were adjusted by imputing the 2017-2019 median for the same administrative unit/health indicator combination.

|  |  | [2] |
| --- | --- | --- |

Internal consistency between pairs of related health indicators was checked by comparing the pairwise ratio of reported values against an expectation derived from the 2017/18 Ghana Multiple Indicator Cluster Survey (GMICS). The checks are detailed in **Table S3**. Following an approach previously used by Agiraembabazi and colleagues for an implementation study conducted in Uganda [9], it was assumed that DHIMS2-derived ratios within +/-15% of the expectation were plausible. No reported values were adjusted based on this check.

***Table S3: Data quality checks performed prior to denominator and coverage/utilisation estimation***

| **Administrative level** | **Data quality metric a** |
| --- | --- |
| **1) Reporting completeness**: the proportion of health facilities expected to submit data to DHIMS2 at a given timepoint that have actually done so | |
| Region | a) The rate of reporting completeness for the Eastern region as a whole, averaged across service types |
| b) The percentage of district/service type combinations for which reporting completeness fell below 90% |
| District | c) The rate of reporting completeness for each individual district, averaged across service types |
| **2) Internal consistency over time**: the extent to which the values reported at a given timepoint cohere with past trends on the same health indicator | |
| Region | a) Across the Eastern region as a whole, the percentage of reported values that are not outliers, defined as values exceeding five median absolute deviations above/below the median of the preceding three years’ trend |
| b) The percentage of districts across the Eastern region for which no reported values were outliers |
| District | c) In each individual district, the percentage of reported values that were not outliers |
| **3) Internal consistency between related indicators**: the extent to which the values reported at a given timepoint cohere with equivalents reported for other, related indicators | |
| Region | a) Across the Eastern region as a whole, the percentage of districts for which the ratio of reported Penta1:Penta2 service events lies between 1.00 and 1.22  According to the 2017/18 GMICS survey report, the crude Penta1 coverage amongst children aged 12-23 was 95.2% in the Eastern region and that of Penta2 was 89.8% [10]. This yields a ratio of 1.06. It is assumed that DHIMS2-derived ratios should lie within a range of +/-15% of the expected ratio, but as the number of Penta1 service events must be at least equal to the number of Penta2 service events a range of 1.00 to 1.22 is used |
| b) Across the Eastern region as a whole, the percentage of districts for which the ratio of reported Penta1:Penta3 service events lies between 1.01 and 1.37  According to the 2017/18 GMICS survey report, the crude Penta1 coverage amongst children aged 12-23 was 95.2% in the Eastern region and that of Penta3 was 80.1% [10]. This yields a ratio of 1.19. It is assumed that DHIMS2-derived ratios should lie within a range of +/-15% of the expected ratio |
| c) Across the Eastern region as a whole, the percentage of districts for which the ratio of reported Penta1:MRV1 service events lies between 0.99 and 1.35  According to the 2017/18 GMICS survey report, the crude Penta1 coverage amongst children aged 12-23 was 95.2% in the Eastern region and that of MRV1 was 81.3% [10]. This yields a ratio of 1.19. It is assumed that DHIMS2-derived ratios should lie within a range of +/-15% of the expected ratio |
| Region/District | d) The ratio of reported Penta1:Penta2 service events for each administrative unit |
| e) The ratio of reported Penta1:Penta3 service events for each administrative unit |
| f) The ratio of reported Penta1:MRV1 service events for each administrative unit |
| **a Data quality checks and metrics were adapted from resources produced by the Countdown to 2030 Collaboration for implementation of Maina and colleagues’ method. Resources are available at: Countdown to 2030 Collaboration (2023) “Health Facility Data & Analysis Center”.** [**https://www.countdown2030.org/tools-for-analysis/health-facility-data-and-analysis**](https://www.countdown2030.org/tools-for-analysis/health-facility-data-and-analysis)**. Accessed 7th October 2024** | |

As the check for internal consistency over time utilises a three-year ‘look-back’ period, Maina and colleagues recommended that at least three consecutive years’ historical data be used to implement their estimation approach [4]. Although the overall number of built Community-Based Health Planning and Services (CHPS) compounds rose steadily and by a significant margin through the 2010s, it is possible that some may have lacked the equipment and resources to operate fully and consistently since being established [11, 12]. Still, CHPS zones lacking a built, or operational, compound may be considered ‘functional’ if a Community Health Officer is *in situ* and providing essential health services in a mobile capacity [13]. Prior to implementing the method at the level of individual HFs it was thus necessary to identify those that were operational and had delivered relevant outpatient services throughout 2017-2020. HF latitude/longitude coordinates were provided by GHS in two tranches and reviewed to eliminate invalid records before geocoding to improve positional accuracy where necessary. Adjustments were confirmed by ensuring that they: (i) placed HFs close to the location recorded on Google Maps, and (ii) (having linked the complete coordinate list to the DHIMS2 extract) placed HFs within the same, or adjacent, sub-district as listed in DHIMS2. Thereafter, the tranches were merged and de-duplicated. An algorithmic approach was then employed to select HFs for analysis where DHIMS2 provided evidence that relevant services were delivered throughout 2017-2020. The DHIMS2 extract was divided into eight discrete intervals of six months’ duration (January to June and July to December of each calendar year) to be processed by the algorithm in chronological order. HFs were marked as excluded from the study from the first interval at which the selection criteria were not met. As such, HFs were only retained for analysis where one or more service events were recorded in all intervals for each of three health indicators:

- First dose of the pentavalent vaccine (Penta1)
- All-cause outpatient attendance (all ages combined)
- Outpatient attendance for diarrhoeal disease (all ages combined)

The coordinate lists provided by GHS further characterised most HFs by type (hospital, health centre, clinic, CHPS compound and CHPS zone without a compound) and ownership (public sector, faith-based organisation or private sector) as of 2023. As this designation was temporally inconsistent with the DHIMS2 data used for this study, which were collected from 2017-2020, any CHPS zone meeting the selection criteria was assumed to have had an operational compound throughout the study period.

Overall, of 1,084 Eastern region HFs with valid latitude/longitude coordinates after geocoding (**Figure S1**), 403 were retained for analysis. Of these, CHPS zones/compounds were most prevalent across the region (65.0%), followed by health centres (27.5%) and hospitals (5.7%). The 49 HFs retained from the three study districts comprised CHPS compounds (73.4%), health centres (20.4%) and hospitals (6.1%) only. The vast majority of CHPS zones without a compound were excluded by the selection algorithm. A comparison (by type and ownership) of the 1,084 Eastern region HFs with valid latitude/longitude coordinates and 403 HFs retained by the algorithm is presented in **Table S4**. Of the 681 Eastern region HFs excluded by the selection algorithm, 468 were public sector/faith-based HFs that had not reported data to DHIMS2 during both the first and second intervals and thus considered to have been non-operational at the start of the study period. A further 143 public sector/faith-based HFs that were considered to have been operational at the start of the study period but had not reported data to DHIMS2 during one or more intervals were excluded. Of these, 29 HFs had not reported data to DHIMS2 during any of the final three intervals, suggesting that they may have been decommissioned or had otherwise ceased to operate mid-period. The remaining 114 HFs were most likely operational throughout 2017-2020, but were excluded by the algorithm as a result of short-term periods of incomplete reporting. Finally, in keeping with previous studies that have observed a gap between the public and private sectors in terms of quality and consistency of reporting to DHIS2 [14, 15], all 70 private sector HFs with valid latitude/longitude coordinates were also found to have failed to submit data to DHIMS2 and were excluded from the study.

***Figure S1: Flow diagram outlining the processes followed to geocode and select health facilities for analysis***

***Table S4: The number and distribution of valid health facility locations received from Ghana Health Service and retained for analysis, by type and ownership***

| **Health facility group** | | **Type of health facility** | **Number (row %)** | | | | **Total**  **(column %)** | **Number (%) excluded a** |
| --- | --- | --- | --- | --- | --- | --- | --- | --- |
| **Public sector** | **Faith-based** | **Private sector** | **Unknown** |
| **Eastern region** | **Health facilities with valid locations** | **Hospital** | 23 (52.3) | 5 (11.4) | 15 (34.1) | 1 (2.3) | 44 (4.1) | - |
| **Clinic** | 10 (18.5) | 4 (7.4) | 33 (61.1) | 7 (13.0) | 54 (5.0) | - |
| **Health centre** | 123 (80.9) | 10 (6.6) | 6 (3.9) | 13 (8.6) | 152 (14.0) | - |
| **CHPS compound** | 549 (96.8) | 1 (0.2) | 0 (0.0) | 17 (3.0) | 567 (52.3) |  |
| **CHPS zone**  **(without compound)** | 246 (99.6) | 1 (0.4) | 0 (0.0) | 0 (0.0) | 247 (22.8) | - |
| **Maternity clinic** | 3 (15.0) | 0 (0.0) | 16 (80.0) | 1 (5.0) | 20 (1.8) | - |
| **All types** | **954 (88.0)** | **21 (1.9)** | **70 (6.5)** | **39 (3.6)** | **1,084 (100.0)** | **-** |
| **Health facilities retained by the selection algorithm** | **Hospital** | 18 (78.3) | 4 (17.4) | 0 (0.0) | 1 (4.3) | 23 (5.7) | 21 (47.7) |
| **Clinic** | 2 (28.6) | 4 (57.1) | 0 (0.0) | 1 (14.3) | 7 (1.7) | 47 (87.0) |
| **Health centre** | 94 (84.7) | 8 (7.2) | 0 (0.0) | 9 (8.1) | 111 (27.5) | 41 (27.0) |
| **CHPS compound** | 231 (97.1) | 0 (0.0) | 0 (0.0) | 7 (2.9) | 238 (59.1) | 329 (58.0) |
| **CHPS zone**  **(without compound)** | 24 (100.0) | 0 (0.0) | 0 (0.0) | 0 (0.0) | 24 (6.0) | 223 (90.3) |
| **Maternity clinic** | 0 (0.0) | 0 (0.0) | 0 (0.0) | 0 (0.0) | 0 (0.0) | 20 (100.0) |
| **All types** | **369 (91.6)** | **16 (4.0)** | **0 (0.0)** | **18 (4.5)** | **403 (100.0)** | **681 (62.8)** |
| **Study districts** | **Health facilities retained by the selection algorithm** | **Hospital** | 2 (66.7) | 1 (33.3) | 0 (0.0) | 0 (0.0) | 3 (6.1) | 0 (0.0) |
| **Clinic** | 0 (0.0) | 0 (0.0) | 0 (0.0) | 0 (0.0) | 0 (0.0) | 1 (100.0) |
| **Health centre** | 8 (80.0) | 0 (0.0) | 0 (0.0) | 2 (20.0) | 10 (20.4) | 2 (16.7) |
| **CHPS compound** | 25 (92.6) | 0 (0.0) | 0 (0.0) | 2 (7.4) | 27 (55.1) | 19 (41.3) |
| **CHPS zone**  **(without compound)** | 9 (100.0) | 0 (0.0) | 0 (0.0) | 0 (0.0) | 9 (18.4) | 6 (40.0) |
| **Maternity clinic** | 0 (0.0) | 0 (0.0) | 0 (0.0) | 0 (0.0) | 0 (0.0) | - |
| **All types** | **44 (89.8)** | **1 (2.0)** | **0 (0.0)** | **4 (8.2)** | **49 (100.0)** | **28 (36.4)** |
| **a The number (%) of excluded health facilities was derived by comparison to the 1,084 valid health facility locations received from Ghana Health Service (see also Figure S1)** | | | | | | | | |

The final months of the study period coincided with the early stages of the COVID-19 pandemic, and it is noted that the stringency of the national response was associated with reduced health service utilisation in many countries of sub-Saharan Africa [16, 17]. The stringency of such measures was relatively low in Ghana through 2020 [17], however, and the exclusion of a roughly even proportion of HFs at each interval (**Figure S2**) suggests that systematic under-utilisation of services due to the pandemic was not responsible for a disproportionate number of HFs being excluded from the study. Still, a recent study examining levels of health service utilisation in 18 LMICs from March 2020 to June 2021 found a shortfall in the volume of outpatient consultations through the second half of 2020 in Ghana, notwithstanding more modest reductions in the uptake of specific maternal and child health interventions [18]. For this reason, post-adjustment monthly utilisation levels for the benchmark and target interventions in the 403 Eastern region HFs retained for analysis were reviewed, and were found to exhibit a similar pattern through the study months coinciding with the pandemic (**Figure S3**). Throughout the study period, utilisation levels varied substantially by month and district, and for the benchmark and all target interventions. For childhood vaccinations, the monthly mean number of service events across districts indicated a progressive, albeit relatively minor, decline in utilisation over the study period. For the Eastern region as a whole the total number of service events also declined through mid-2020 before a partial recovery to pre-pandemic levels in the second half of the year. Although similar patterns were evident in respect of diarrhoea service utilisation amongst u1s, there appeared to be a more pronounced decline through the study period and a less convincing recovery in late 2020. Having observed a similar contrast between childhood vaccination and diarrhoea service utilisation, the authors of a study examining the indirect effects of the pandemic on maternal and child health in South Africa suggested that a possible mechanism was declining infectious disease incidence following increased uptake of protective health behaviours, such as social distancing and handwashing, in the community [19].

***Figure S2: Progression of health facility inclusion/exclusion through successive intervals of the study period and resulting in the 403 health facilities retained for analysis***


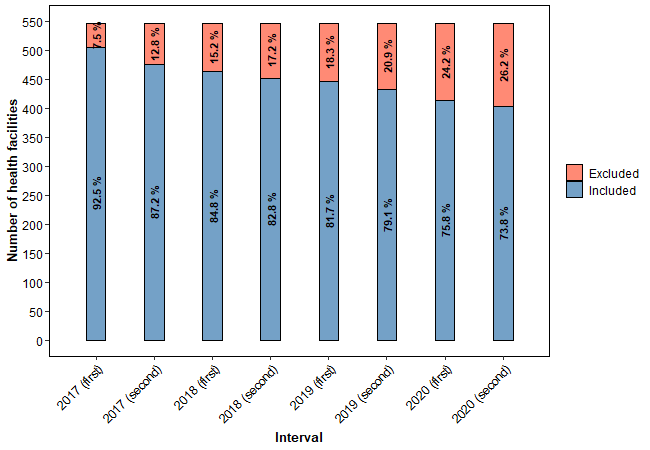


**The baseline number of health facilities included in this figure is 546: this number is comprised of 1,084 valid health facility locations received from Ghana Health Service, minus 468 public sector/faith-based health facilities considered to be non-operational as at the start of the study period and 70 private sector health facilities failing to submit data to DHIMS2. The remaining health facilities were designated by the algorithm as included in the study until the first interval at which they failed to meet the selection criteria. Once excluded, health facilities can no longer return to the included group, even if meeting the selection criteria at a later interval(s)**

***Figure S3: Region- and district-level post-adjustment service utilisation levels throughout 2017-2020 amongst 403 Eastern region health facilities retained for analysis, by health indicator***


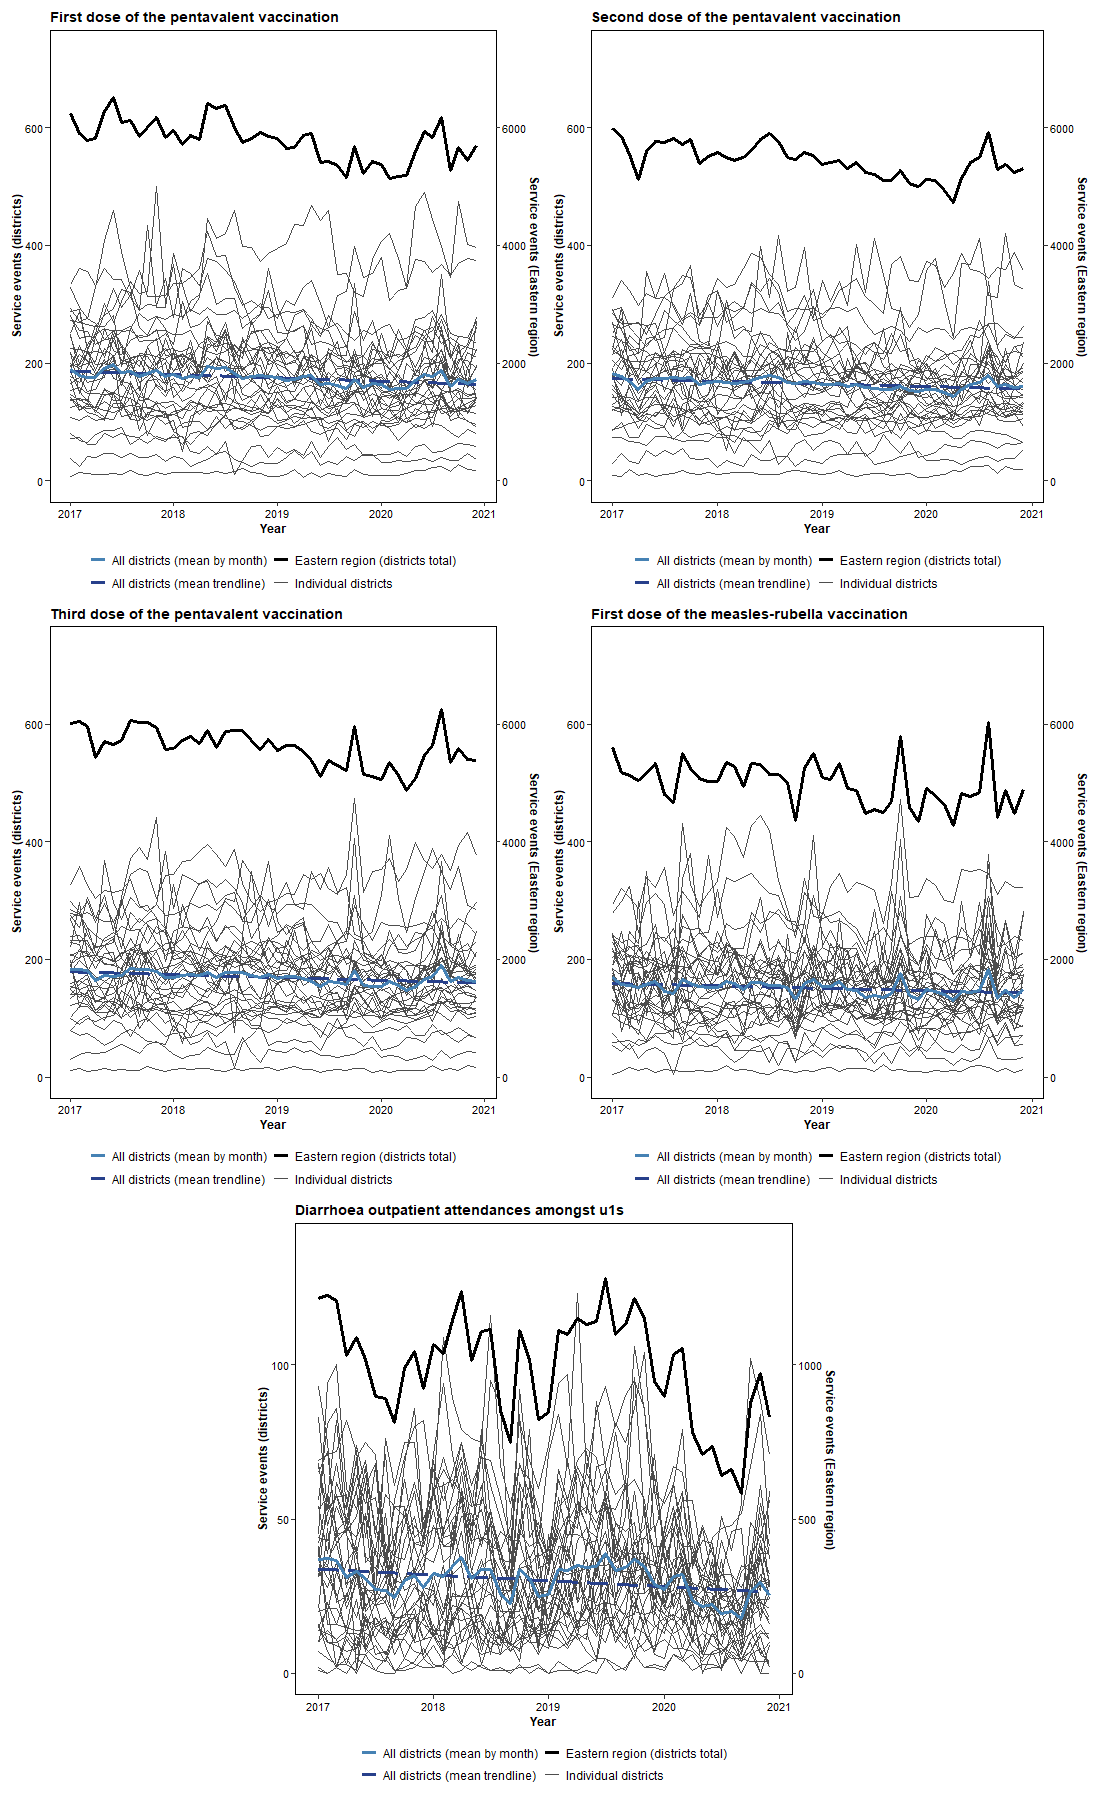


**The district-level number and mean number of service events reported (after applying all data quality adjustments) are plotted on the primary y-axis (left) and the number reported across the Eastern region as a whole are plotted on the secondary y-axis (right). Only the 403 health facilities retained by the selection algorithm are included**

The results of the DQ checks are reported at region-/district-levels in **Table S5**. Overall, the quality of DHIMS2 data in 2020 was generally found to be of a high standard amongst the HFs retained for analysis. This was likely, in part, an artefact of our algorithm selection criteria being linked to reporting completeness. The completeness of reporting reached 99% across the Eastern region and 100% in almost half of the districts therein. The level of reporting completeness was consistently high for indicators related to the benchmark and target interventions (‘vaccination delivery’ and ‘diarrhoea service events’ groups), in addition to the broader group of indicators provided by GHS. Few of the values reported in 2020 were found to be inconsistent with trends derived from 2017-2019 and identified as outliers. However, like contemporaneous studies from Ghana [20, 21], consistency between related indicators emerged from our analysis as an outstanding issue requiring further attention. While the ratio of service events for Penta1/Penta2 and Penta1/MRV1 were in line with the expectation for 69.7% of Eastern region districts, the same was true for Penta1/Penta3 in only 42.4% of districts. The remainder (including the three study districts) reported an excess volume of Penta3 service events in comparison with Penta1.

***Table S5: Summary metrics describing the quality of routinely collected health data from the Eastern region and three study districts as of 2020***

| **Data quality check a** | | **Health indicator group b** | **Administrative unit c** | | | |
| --- | --- | --- | --- | --- | --- | --- |
| **Eastern region** | **Atiwa West district** | **Denkyembour district** | **Kwaebibirem district** |
| **1a** | Overall rate of reporting completeness for the region | - Vaccination delivery - Diarrhoea service events | 99.3 | - | - | - |
| All services | 98.9 | - | - | - |
| **1b** | Overall percentage of district/service type combinations for which reporting completeness fell below 90% | - Vaccination delivery - Diarrhoea service events | 1.5 | - | - | - |
| All services | 1.1 | - | - | - |
| **1c** | Rate of reporting completeness for the district | - Vaccination delivery - Diarrhoea service events | - | 100.0 | 99.7 | 99.5 |
| All services | - | 100.0 | 99.8 | 98.1 |
| **2a** | Percentage of reported values from the region that are not outliers | - Vaccination delivery - Diarrhoea service events | 99.3 | - | - | - |
| All services | 98.2 | - | - | - |
| **2b** | Percentage of districts across the region for which no reported values were outliers | - Vaccination delivery - Diarrhoea service events | 75.8 | - | - | - |
| All services | 30.3 | - | - | - |
| **2c** | Percentage of reported values from the district that are not outliers | - Vaccination delivery - Diarrhoea service events | - | 97.9 | 100.0 | 100.0 |
| All services | - | 98.4 | 91.7 | 99.2 |
| **3a** | Percentage of districts across the region for which the ratio of reported service events for related health indicators lies within the expected range | Penta1:Penta2 ratio | 69.7 | - | - | - |
| **3b** | Penta1:Penta3 ratio | 42.4 | - | - | - |
| **3c** | Penta1:MRV1 ratio | 69.7 | - | - | - |
| **3d** | Ratio of reported service events from the district for related health indicators | Penta1:Penta2 ratio | 1.04 | 1.02 | 0.99 | 0.99 |
| **3e** | Penta1:Penta3 ratio | 1.02 | 0.98 | 0.94 | 0.96 |
| **3f** | Penta1:MRV1 ratio | 1.16 | 1.08 | 1.14 | 1.08 |
| **a Data quality checks and metrics were adapted from resources produced by the Countdown to 2030 Collaboration for implementation of Maina and colleagues’ method. Resources are available at: Countdown to 2030 Collaboration (2023) “Health Facility Data & Analysis Center”.** <https://www.countdown2030.org/tools-for-analysis/health-facility-data-and-analysis>**. Accessed 7th October 2024**  **b ‘Vaccination delivery’ encapsulates five health indicators related to essential childhood vaccinations: BCG, Penta1, Penta2, Penta3 and MRV1. ‘Diarrhoea service events’ encapsulates diarrhoea-related health indicators: service events amongst children aged under 1 year, children aged under 5 years, and amongst all ages combined. ‘All services’ encapsulates all health indicators extracted from DHIMS2 for the study**  **c The data quality metrics reported for the Eastern region as a whole summarise all 33 districts therein. District-level metrics are reported for the three study districts only** | | | | | | |

**List of abbreviations**

BCG: Bacillus Calmette-Guerin vaccination; CHPS: Community-Based Health Planning and Services (initiative); DHIMS2: District Health Information Management System; DHIS2: District Health Information Software; DQ: data quality; GHS: Ghana Health Service; GMICS: 2017/18 Ghana Multiple Indicator Cluster Survey; HF: health facility; MAD: median absolute deviation; MRV1: first dose of the measles-rubella vaccine; Penta1: first dose of the pentavalent vaccine; Penta2: second dose of the pentavalent vaccine; Penta3: third dose of the pentavalent vaccine; RCHD: routinely collected health data; RHIS: routine health information system

**References**

1. Hotchkiss D, Diana M, and Foreit K, *How Can Routine Health Information Systems Improve Health Systems Functioning in Low-Resource Settings? Assessing the Evidence Base*. 2012, MEASURE Evaluation: Chapel Hill.

2. World Health Organization. *Framework and Standards for Country Health Information Systems*. 2008 [cited 2021 10th June 2021]; Available from: <https://www.who.int/healthinfo/country_monitoring_evaluation/who-hmn-framework-standards-chi.pdf>.

3. World Health Organization, *Data quality review: a toolkit for facility data quality assessment*. 2017, World Health Organization: Geneva.

4. Maina, I., et al., *Using health-facility data to assess subnational coverage of maternal and child health indicators, Kenya.* Bull World Health Organ, 2017. **95**(10): p. 683-694.

5. Countdown to 2030 Collaboration. *Health Facility Data & Analysis Center*. 2024 [cited 2024 7th October 2024]; Available from: <https://www.countdown2030.org/tools-for-analysis/health-facility-data-and-analysis>.

6. Farnham, A., et al., *A roadmap for using DHIS2 data to track progress in key health indicators in the Global South: experience from sub-saharan Africa.* BMC Public Health, 2023. **23**(1): p. 1030.

7. Maïga, A., et al., *Measuring coverage of maternal and child health services using routine health facility data: a Sierra Leone case study.* BMC Health Serv Res, 2021. **21**(Suppl 1): p. 547.

8. Davies L and Gather U, *The Identification of Multiple Outliers.* Journal of the American Statistical Association, 1993. **88**(423): p. 782-792.

9. Agiraembabazi, G., et al., *Can routine health facility data be used to monitor subnational coverage of maternal, newborn and child health services in Uganda?* BMC Health Serv Res, 2021. **21**(Suppl 1): p. 512.

10. Ghana Statistical Service, *Multiple Indicator Cluster Survey (MICS 2017/18): Survey Findings Report*. 2018, Ghana Statistical Service: Accra.

11. Mahama, P.N., et al., *Leaving no disease behind: The roadmap to securing universal health security and what this means for the surveillance of infectious diseases in Ghana as a precedent for sub-Saharan Africa.* PLoS One, 2023. **18**(4): p. e0284931.

12. Yeboah BK, et al., *Progress of Community-Based Health Planning and Services in Ghana.* Global Scientific Journals, 2019. **7**(12).

13. Awoonor-Williams JK, et al., *Lessons learned from scaling up a community-based health program in the Upper East Region of northern Ghana.* Global Health: Science and Practice, 2013. **1**(1).

14. Muhoza, P., et al., *A data quality assessment of the first four years of malaria reporting in the Senegal DHIS2, 2014-2017.* BMC Health Serv Res, 2022. **22**(1): p. 18.

15. Githinji, S., et al., *Completeness of malaria indicator data reporting via the District Health Information Software 2 in Kenya, 2011-2015.* Malar J, 2017. **16**(1): p. 344.

16. Amouzou, A., et al., *Health service utilisation during the COVID-19 pandemic in sub-Saharan Africa in 2020: a multicountry empirical assessment with a focus on maternal, newborn and child health services.* BMJ Glob Health, 2022. **7**(5).

17. Reddy, T., et al., *Associations between the stringency of COVID-19 containment policies and health service disruptions in 10 countries.* BMC Health Serv Res, 2023. **23**(1): p. 363.

18. Ahmed, T., et al., *Healthcare utilization and maternal and child mortality during the COVID-19 pandemic in 18 low- and middle-income countries: An interrupted time-series analysis with mathematical modeling of administrative data.* PLoS Med, 2022. **19**(8): p. e1004070.

19. Thsehla, E., et al., *Indirect effects of COVID-19 on maternal and child health in South Africa.* Glob Health Action, 2023. **16**(1): p. 2153442.

20. Lasim, O.U., E.W. Ansah, and D. Apaak, *Maternal and child health data quality in health care facilities at the Cape Coast Metropolis, Ghana.* BMC Health Serv Res, 2022. **22**(1): p. 1102.

21. Piu, L.J., et al., *Assessment of expanded programme on immunization routine data quality in the upper east region of Ghana.* BMC Health Serv Res, 2024. **24**(1): p. 886.
